# Supplementary material for: Odonata: Who They Are and What They Have Done for Us Lately: Classification and Ecosystem Services of Dragonflies
Source: PubMed Central journal article supplement (PMC6468591; doi:10.3390/insects10030062), 2019-02-28
Supplement: insects-10-00062-s001.pdf [file insects-10-00062-s001.pdf]

Review

# Odonata: Who They Are and What They Have Done for Us Lately: Classification and Ecosystem Services of Dragonflies

Michael L. May

Department of Entomology, Rutgers University, New Brunswick, NJ 08901, USA; may@aesop.rutgers.edu

Received: 26 January 2019; Accepted: 22 February 2019; Published: date

## Supplementary Materials

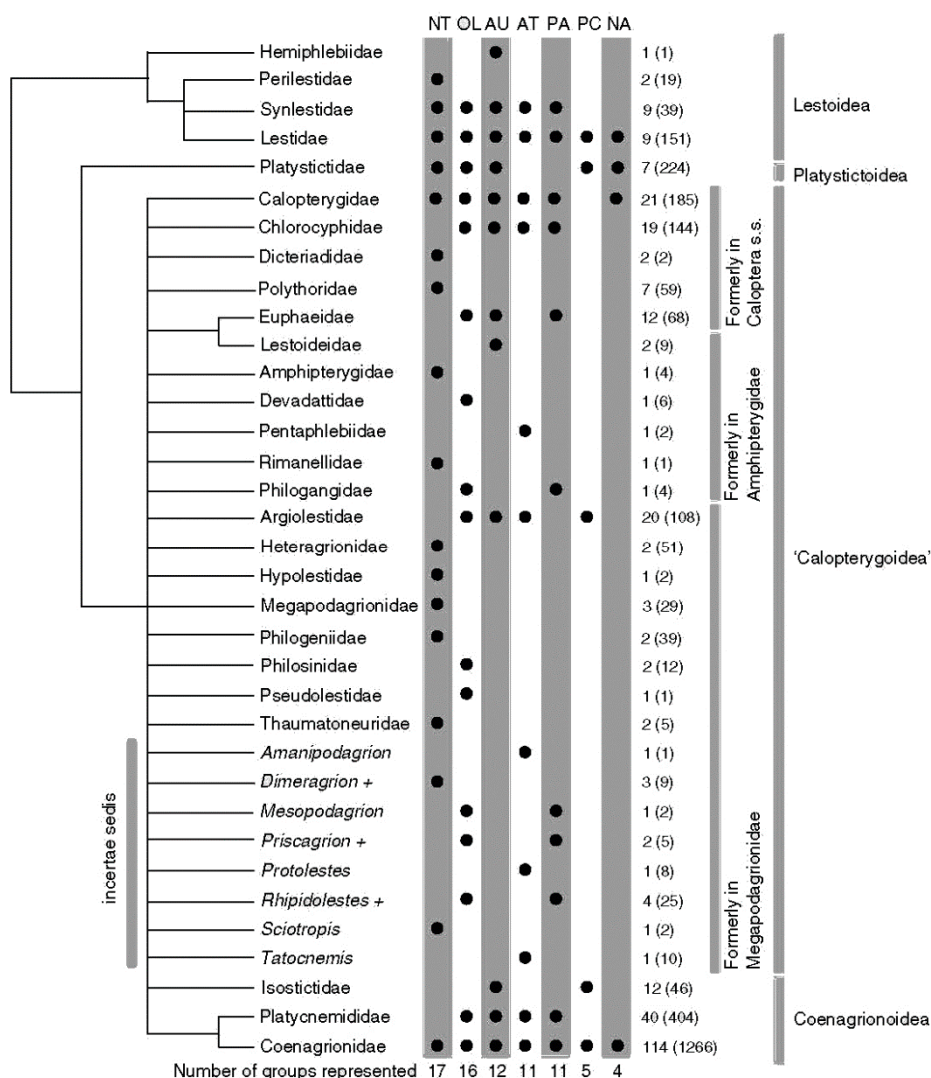

**Figure S1.** Abbreviated phylogram of Zygoptera. Only monophyletic family names are show; shaded area indicates geographic distribution. From Dijkstra, et al., 2013 [1].

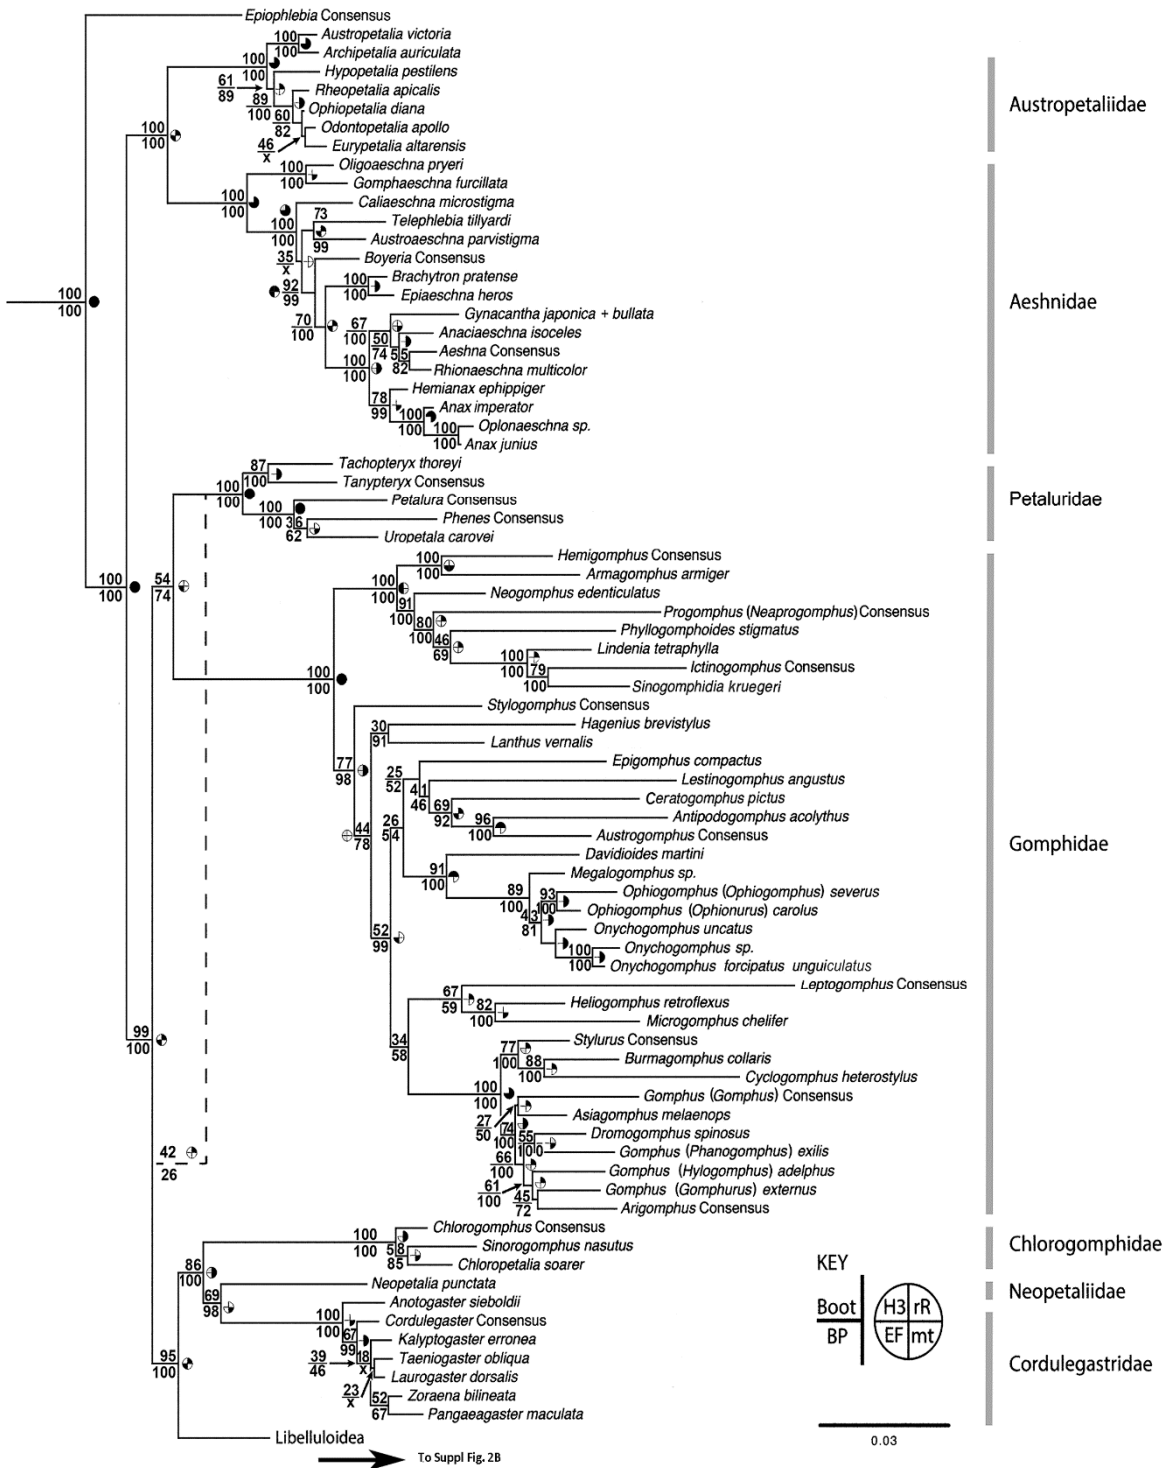

A

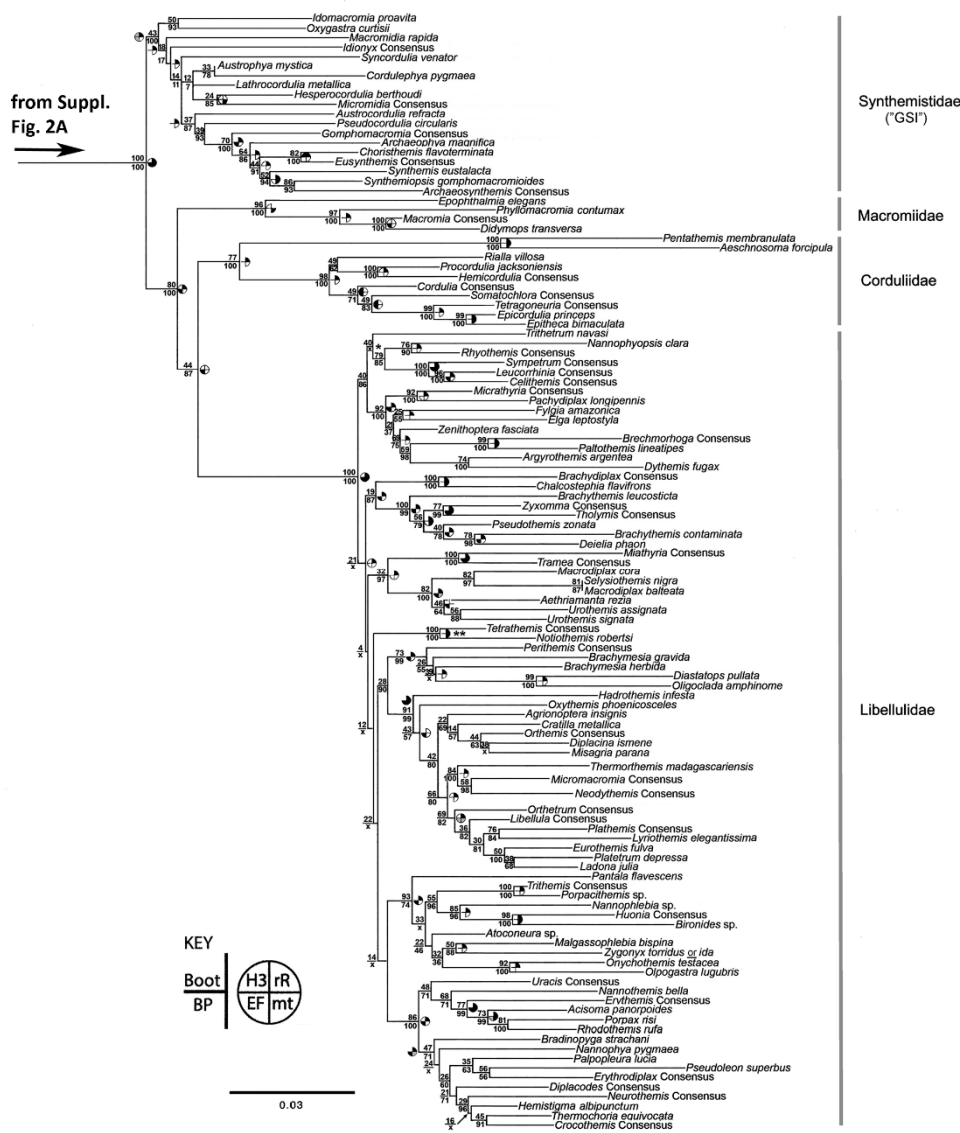

B

Figure 2. (A) Phylogram of non-libelluloid Anisoptera. From Carle, et al., 2015 [2]; (B) Phylogram of libelluloid Anisoptera. From Carle, et al. 2015 [2].

## References

1. Dijkstra, K.-D.B.; Kalkman, V.J.; Dow, R.A.; Stokvis, F.R.; Van Tol, J. Redefining the damselfly families: A comprehensive molecular phylogeny of Zygoptera (Odonata). *Syst. Entomol.* **2014**, *39*, 68–96.
2. Carle, F.L.; Kjer, K.M.; May, M.L. A molecular phylogeny and classification of Anisoptera (Odonata). *Arthropod Syst. Phylogeny* **2015**, *73*, 281–301.

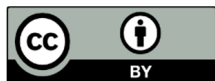

© 2019 by the authors. Licensee MDPI, Basel, Switzerland. This article is an open access article distributed under the terms and conditions of the Creative Commons Attribution (CC BY) license (<http://creativecommons.org/licenses/by/4.0/>).
